# Supplementary material for: Sensory improvement and antioxidant enhancement in silver carp hydrolysate using prebiotic oligosaccharides: insights from the Maillard reaction
Source: Royal Society of Chemistry journal article supplement (doi:10.1039/d4fo01284d), 2024-01-01
Supplement: d4fo01284d1.pdf [file d4fo01284d1.pdf]

**Table S1** Flavor attributes with definitions, and reference materials used for taste profile analysis.

| <b>Flavor attribute</b> | <b>Definitions</b>                                                 | <b>Reference materials</b>                            |
|-------------------------|--------------------------------------------------------------------|-------------------------------------------------------|
| Caramel-like            | caramel flavor associated with burned sugar                        | 0.01 g/L 4-hydroxy-2,5 dimethyl-3(2H) furanone        |
| Bitterness              | bitter taste felt in back side of the tongue                       | 0.15 g/L quinine                                      |
| Salty                   | salty taste                                                        | 2.0 g/L NaCl                                          |
| Sourness                | puckering up of mouth                                              | 1.5 g/L citric acid                                   |
| Fishy taste             | undesired earthy flavor commonly found in freshwater fish          | -                                                     |
| Umami                   | flavor associated with umami                                       | 1.0 g/L monosodium glutamate                          |
| Kokumi                  | a comprehensive taste containing thickness, richness, and fullness | 5.0 mmol/L reduced glutathione in chicken breast soup |

**Table S2** The sensitive objects corresponding to 10 E-nose sensors.

| <b>Sensor Name</b> | <b>Object Substances of Sensing</b> |
|--------------------|-------------------------------------|
| W1C                | Aromatic 1                          |
| W5S                | Broad-range                         |
| W3C                | Aromatic 2                          |
| W6S                | Hydrogen                            |
| W5C                | Aroma-aliph                         |
| W1S                | Broad-methane                       |
| W1W                | Sulfur-organic                      |
| W2S                | Broad-alcohol                       |
| W2W                | Sulfur-chlor                        |
| W3S                | Methane-aliph                       |

**Table S3** The intermediate products, browning intensity, reducing power, ferric reducing/antioxidant power (FRAP), DPPH radical scavenging activity, and oxygen radical absorbance capacity (ORAC) of different oligosaccharides heated alone. XOS, xylo-oligosaccharide; GOS, galacto-oligosaccharides; FOS, fructo-oligosaccharide; STA, stachyose; IOS, isomalto-oligosaccharide.

|                                                          | <b>XOS-Heated</b> | <b>GOS-Heated</b> | <b>FOS-Heated</b> | <b>STA-Heated</b> | <b>IOS-Heated</b> |
|----------------------------------------------------------|-------------------|-------------------|-------------------|-------------------|-------------------|
| <b>Intermediate products<br/>(OD<sub>294nm</sub>)</b>    | 0.007±0.001a      | 0.003±0.001c      | 0.001±0.001c      | 0.007±0.001a      | 0.005±0.001b      |
| <b>Browning intensity<br/>(OD<sub>420nm</sub>)</b>       | 0.002±0.001b      | 0.002±0.001b      | 0.003±0.001b      | 0.012±0.003a      | 0.005±0.001b      |
| <b>Reducing power<br/>(OD<sub>700 nm</sub>)</b>          | 0.032±0.016ab     | 0.028±0.004b      | 0.048±0.022ab     | 0.058±0.015a      | 0.038±0.013ab     |
| <b>FRAP<br/>(mM FeSO<sub>4</sub>/mg sample)</b>          | 0.030±0.003a      | 0.023±0.001a      | 0.006±0.006b      | 0.031±0.005a      | 0.024±0.013a      |
| <b>DPPH radical<br/>scavenging<br/>(μM TE/mg sample)</b> | 0.941±0.241a      | 1.535±0.617a      | 2.198±0.173a      | 1.432±0.145a      | 1.158±0.242a      |
| <b>ORAC<br/>(mM TE/mg sample)</b>                        | 0.039±0.002b      | 0.037±0.002b      | 0.043±0.001a      | 0.038±0.004b      | 0.041±0.002ab     |

**Table S4** Molecular weight distribution of MRPs prepared by different oligosaccharides, ASCH, and PSCH.

| Samples      | < 500 Da (%) | 500-1000 Da (%) | 1000-2000 Da (%) | 2000-3000 Da (%) | 3000-5000 Da (%) | > 5000 Da (%) |
|--------------|--------------|-----------------|------------------|------------------|------------------|---------------|
| Unhydrolyzed | 26.61±0.05k  | 1.44±0.09k      | 2.10±0.02i       | 1.96±0.02e       | 3.92±0.04a       | 63.98±0.09a   |
| ASCH         | 46.81±0.03j  | 25.43±0.04b     | 17.19±0.02a      | 5.97±0.06a       | 3.87±0.02a       | 0.74±0.03b    |
| ASCH-Heated  | 68.90±0.05g  | 18.32±0.14c     | 9.19±0.08d       | 2.62±0.09c       | 0.86±0.09d       | 0.11±0.01d    |
| ASCH-XOS     | 68.49±0.06h  | 17.51±0.08e     | 9.58±0.11c       | 2.98±0.04b       | 1.24±0.04b       | 0.21±0.02c    |
| ASCH-GOS     | 69.20±0.11f  | 18.15±0.05c     | 9.11±0.13d       | 2.57±0.01c       | 0.84±0.02d       | 0.14±0.03d    |
| ASCH-FOS     | 69.02±0.14fg | 18.14±0.03c     | 9.22±0.15d       | 2.63±0.06c       | 0.88±0.08d       | 0.12±0.01d    |
| ASCH-STA     | 69.52±0.10f  | 17.90±0.06d     | 9.06±0.08de      | 2.56±0.06c       | 0.85±0.03d       | 0.12±0.02d    |
| ASCH-IOS     | 70.44±0.08e  | 17.41±0.04e     | 8.79±0.26e       | 2.43±0.04d       | 0.81±0.04d       | 0.12±0.01d    |
| PSCH         | 54.44±0.09i  | 27.34±0.08a     | 14.15±0.11b      | 2.99±0.03b       | 0.97±0.05c       | 0.11±0.02d    |
| PSCH-Heated  | 88.48±0.05a  | 9.70±0.06j      | 1.78±0.12j       | 0.05±0.03h       | 0.04±0.01g       | 0.01±0.01e    |
| PSCH-XOS     | 77.72±0.02d  | 15.06±0.15g     | 5.85±0.09f       | 1.05±0.04f       | 0.31±0.04e       | 0.02±0.01e    |
| PSCH-GOS     | 79.30±0.12b  | 14.76±0.06h     | 5.01±0.12h       | 0.73±0.06g       | 0.18±0.03f       | 0.01±0.01e    |

|          |             |             |            |            |            |            |
|----------|-------------|-------------|------------|------------|------------|------------|
| PSCH-FOS | 78.46±0.06c | 15.27±0.14g | 5.28±0.08g | 0.77±0.02g | 0.19±0.06f | 0.02±0.01e |
| PSCH-STA | 79.67±0.09b | 14.50±0.05i | 4.92±0.14h | 0.72±0.02g | 0.18±0.04f | 0.02±0.01e |
| PSCH-IOS | 77.94±0.07d | 15.64±0.03f | 5.42±0.11g | 0.79±0.01g | 0.20±0.01f | 0.02±0.01e |

---

Different lowercase letters indicate the significant difference ( $p < 0.05$ ). ASCH, whole silver carp hydrolysates prepared by alcalase; PSCH, whole silver carp hydrolysates prepared by papain; XOS, xylo-oligosaccharide; GOS, galacto-oligosaccharides; FOS, fructo-oligosaccharide; STA, stachyose; IOS, isomalto-oligosaccharide.

**Table S5** Volatile compounds identified in hydrolysates and their MRPs.

| <b>Compounds</b>                  | <b>CAS number</b> | <b>Molecular formula</b> | <b>Retention index</b> | <b>Retention time (s)</b> | <b>Drift time (ms)</b> |
|-----------------------------------|-------------------|--------------------------|------------------------|---------------------------|------------------------|
| <i>Aldehyde</i>                   |                   |                          |                        |                           |                        |
| Methional                         | 3268-49-3         | C4H8OS                   | 942.3                  | 168.434                   | 1.405                  |
| Phenylacetaldehyde                | 122-78-1          | C8H8O                    | 1062.8                 | 275.38                    | 1.255                  |
| Anisaldehyde                      | 123-11-5          | C8H8O2                   | 1255.1                 | 614.842                   | 1.669                  |
| (E, E)-2,4-Decadienal             | 25152-84-5        | C10H16O                  | 1257.3                 | 620.372                   | 1.412                  |
| <i>Ketone</i>                     |                   |                          |                        |                           |                        |
| 2-Heptanone                       | 110-43-0          | C7H14O                   | 893.9                  | 138.722                   | 1.243                  |
| Acetophenone                      | 98-86-2           | C8H8O                    | 1060.5                 | 272.772                   | 1.561                  |
| 1-(4-methylphenyl)-<br>Ethanone   | 122-00-9          | C9H10O                   | 1157.4                 | 408.029                   | 1.694                  |
| Isomenthone                       | 491-07-6          | C10H18O                  | 1113.1                 | 339.287                   | 1.335                  |
| <i>Esters</i>                     |                   |                          |                        |                           |                        |
| 2-Methylbutanol<br>acetate        | 624-41-9          | C7H14O2                  | 874.5                  | 128.438                   | 1.284                  |
| 2-Methylpropyl<br>butanoate       | 539-90-2          | C8H16O2                  | 939.1                  | 166.26                    | 1.330                  |
| Benzyl acetate                    | 140-11-4          | C9H10O2                  | 1156.1                 | 405.803                   | 1.329                  |
| Isopentyl isovalerate             | 659-70-1          | C10H20O2                 | 1080.4                 | 296.248                   | 1.458                  |
| 2-Phenyl ethyl acetate            | 103-45-7          | C10H12O2                 | 1258.1                 | 622.583                   | 1.808                  |
| Citronellyl acetate               | 150-84-5          | C12H22O2                 | 1316.7                 | 797.348                   | 1.474                  |
| Isobornyl acetate                 | 125-12-2          | C12H20O2                 | 1320.9                 | 811.442                   | 1.201                  |
| <i>Heterocyclic compound</i>      |                   |                          |                        |                           |                        |
| 4,5-Dihydro-3(2H)-<br>thiophenone | 1003-04-9         | C4H6OS                   | 969.5                  | 187.997                   | 1.179                  |
| 2-Furanmethanol                   | 98-00-0           | C5H6O2                   | 836.4                  | 110.613                   | 1.122                  |
| 2-Acetylfuran                     | 1192-62-7         | C6H6O2                   | 871.9                  | 127.134                   | 1.114                  |
| 5-Methyl-2-<br>furanmethanol      | 3857-25-8         | C6H8O2                   | 939.1                  | 166.26                    | 1.264                  |
| 5-Ethyl-4-hydroxy-2-              | 27538-09-6        | C7H10O3                  | 1063.2                 | 275.889                   | 1.346                  |

|                                     |           |         |        |         |       |
|-------------------------------------|-----------|---------|--------|---------|-------|
| methyl-3(2H)-<br>furanone           |           |         |        |         |       |
| Benzothiazole                       | 95-16-9   | C7H5NS  | 1221.7 | 534.108 | 1.152 |
| 2-n-Butylfuran                      | 4466-24-4 | C8H12O  | 891.8  | 137.567 | 1.184 |
| 2-Pentylfuran                       | 3777-69-3 | C9H14O  | 1011.2 | 222.777 | 1.241 |
| <i>Aromatic compounds</i>           |           |         |        |         |       |
| Phenol                              | 108-95-2  | C6H6O   | 974.1  | 191.475 | 1.047 |
| Aniline                             | 62-53-3   | C6H7N   | 971.4  | 189.456 | 1.420 |
| 1,2-Dimethylbenzene                 | 95-47-6   | C8H10   | 834.4  | 109.744 | 1.048 |
| Styrene                             | 100-42-5  | C8H8    | 891.8  | 137.567 | 1.052 |
| <i>Others</i>                       |           |         |        |         |       |
| 2-Methylbutyric acid                | 116-53-0  | C5H10O2 | 865.7  | 124.09  | 1.202 |
| Diethylene glycol<br>dimethyl ether | 111-96-6  | C6H14O3 | 936.5  | 164.521 | 1.171 |
| Camphene                            | 79-92-5   | C10H16  | 969    | 187.563 | 1.213 |
| Undecane                            | 1120-21-4 | C11H24  | 1118   | 346.243 | 1.085 |

---

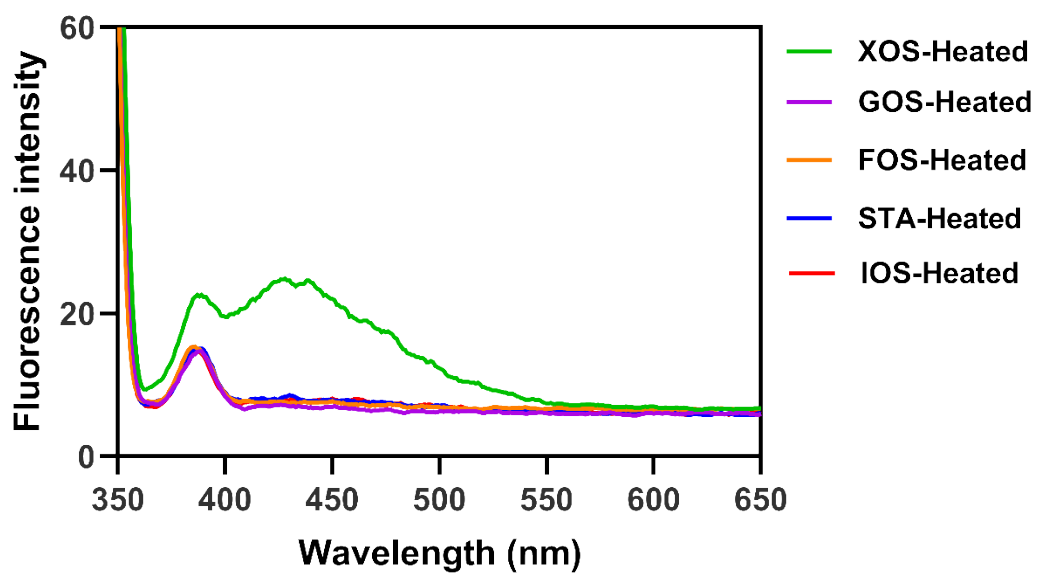

**Fig. S1** The fluorescence spectra of different oligosaccharides heated alone. XOS, xylo-oligosaccharide; GOS, galacto-oligosaccharides; FOS, fructo-oligosaccharide; STA, stachyose; IOS, isomalto-oligosaccharide.



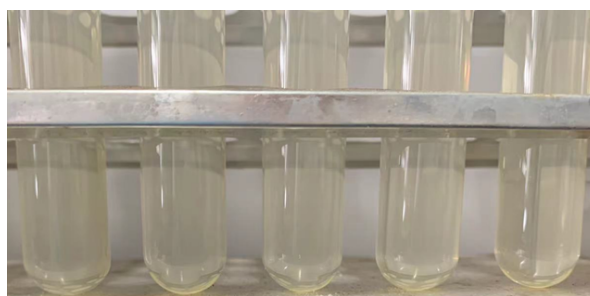

**GOS XOS FOS IOS STA**

**Fig. S2** The images of different oligosaccharides heated alone. GOS, galacto-oligosaccharides; XOS, xylo-oligosaccharide; FOS, fructo-oligosaccharide; IOS, isomalto-oligosaccharide; STA, stachyose.
